# Supplementary material
Source: ML conference proceedings conference paper supplement (https://openaccess.thecvf.com/content/CVPR2023/html/Duan_Federated_Learning_With_CVPR_2023_paper.html)
Supplement: Supplementary file 1 [file Duan_Federated_Learning_With_CVPR_2023_supplemental.pdf]

# Appendix of Paper “Federated Learning with Data-Agnostic Distribution Fusion”

## A Pseudo-code of FedFusion

---

**Algorithm 1:** The FedFusion algorithm.

---

```

1 Initialize  $\mathbf{w}^0$ .
2 for each communication round  $t = 0, 1, \dots, T - 1$  do
3    $\mathbf{w}_k^{t+1}$  := the model received from client  $k$ 
4    $\mathbf{d}_k := (\hat{\boldsymbol{\mu}}_k, \hat{\boldsymbol{\sigma}}_k, \hat{\boldsymbol{\beta}}_k, \hat{\boldsymbol{\gamma}}_k)$  // extracted from  $\mathbf{w}_k^{t+1}$ 
5   repeat
6     Inference  $\boldsymbol{\kappa}_m, \boldsymbol{\zeta}_m, \boldsymbol{\nu}_m, \boldsymbol{\varsigma}_m, \boldsymbol{\nu}'_m$  and  $\boldsymbol{\varsigma}'_m$  based on encoder  $\phi$ 
7      $\mathbf{b}_k, \boldsymbol{\lambda}_k, \mathbf{c}_k$  := sampling from distributions with Eq. 3, 5, 6
8      $\tilde{\mathbf{z}}_m$  := sampling from  $\mathcal{N}(\boldsymbol{\nu}'_m, \boldsymbol{\varsigma}'_m)$ 
9      $\mathbf{z}_k := \sum_{m=1}^M b_{km} \cdot \tilde{\mathbf{z}}_m$ 
10    Recover  $\mathbf{z}_k$  to  $\mathbf{d}_k$  based on decoder  $\theta$  with Eq. 10
11  until VAE converge;
12   $\mathbf{w}^{t+1} := \sum_{m=1}^M \pi_m \sum_{k=1}^K b_{km} \cdot c_{km} \cdot \mathbf{w}_k^{t+1}$  // model aggregation
13  broadcast  $\mathbf{w}^{t+1}$  to all clients

```

---

## B Convergence of FedFusion

This section proof the convergence of the proposed FedFusion method. Before proposing the proof, we present the following assumptions and definitions.

**Assumption 1** (Bounded Taylor’s Approximation): We assume that the loss function  $f(\cdot)$  has  $L$ -smooth and  $\tau$ -weak convexity, that is, for all  $\mathbf{w}_i$  and  $\mathbf{w}_j$ :

$$(\mathbf{w}_i - \mathbf{w}_j)^T \nabla f(\mathbf{w}_j) + \frac{\tau}{2} \|\mathbf{w}_i - \mathbf{w}_j\|^2 \leq f(\mathbf{w}_i) - f(\mathbf{w}_j) \leq (\mathbf{w}_i - \mathbf{w}_j)^T \nabla f(\mathbf{w}_j) + \frac{L}{2} \|\mathbf{w}_i - \mathbf{w}_j\|^2,$$

where  $\tau \leq L$  and  $L > 0$ .

Note that when  $\tau < 0$ , the above assumption covers non-convexity functions.

**Assumption 2** (Bounded Gradients Variance): Let  $\hat{\mathbf{x}}_k$  is the sampled data from client- $k$  and  $\mathbf{g}_k = \nabla f(\mathbf{w}_k, \hat{\mathbf{x}}_k)$  is the gradient in regard to  $\hat{\mathbf{x}}_k$ . We assume the stochastic gradients  $\mathbf{g}_k$  has the following upper-bounded variances in the whole training process: (1)  $\mathbb{E}\|\mathbf{g}_k - \mathbb{E}[\mathbf{g}_k]\|^2 \leq V, V \in \mathbb{R}$ ; and (2)  $\mathbb{E}\|\mathbf{g}_k\|^2 \leq G, G \in \mathbb{R}$ .

**Definition 1** (Diameter of Domain): Given a function  $f(\mathbf{w})$ , where  $\mathbf{w} \in \mathbb{W}$ , and  $\mathbb{W}$  is  $f$ ’s domain of definition. The diameter of  $\mathbb{W}$  is denoted by  $\Gamma$ : for every  $\mathbf{w}_i, \mathbf{w}_j \in \mathbb{W}$ :  $\|\mathbf{w}_i - \mathbf{w}_j\| \leq \Gamma$ .

**Theorem 1** (Convergence Bound): If Assumption 1 and 2 hold, with learning epoch  $T$ , local epoch  $E$ , diameter of domain  $\Gamma$ , and learning rate  $\eta$ , we have the following convergence bound for the proposed FedFusion algorithm:

$$\mathbb{E}[f(\mathbf{w}^T)] - f(\mathbf{w}^*) \leq \frac{L}{E+T} \left( \frac{A}{\tau} + \frac{E+1}{2} \Gamma^2 \right), \quad (1)$$

where  $\mathbf{w}^*$  are the optimal parameters;  $\mathbf{w}^T$  are the parameters at the  $T$ -th learning epoch, and  $A$  is a constant:

$$A = 4\eta(E-1)^2 G + \eta \sum_{m=1}^M \pi_m^2 V + 2\eta G + 2\Gamma G + L\Gamma^2.$$

**Corollary 1 (Convergence Rate):** *If Assumption 1 and 2 hold, with learning epoch  $T$  and local epoch  $E$ , we have the following convergence rate for the proposed FedFusion algorithm:*

$$\mathbb{E}[f(\mathbf{w}^T)] - f(\mathbf{w}^*) \leq \mathcal{O}\left(\frac{1}{E+T}\right). \quad (2)$$

The proof is based on the convergence rate analyzed in [1]. We denote the optimal solution for  $\mathbf{w}$  as  $\mathbf{w}^*$ . Notice that  $\bar{\mathbf{v}}^{t+1} = \bar{\mathbf{w}}^t - \eta \mathbf{g}^t$  where  $\mathbf{g}^t$  is the gradient. According to Assumption 1, 2 we have:

$$\|\bar{\mathbf{v}}^{t+1} - \mathbf{w}^*\|^2 = \|\bar{\mathbf{w}}^t - \mathbf{w}^* - \eta \mathbf{g}^t\|^2 + \eta^2 \|\mathbf{g}^t - \bar{\mathbf{g}}^t\|^2, \quad (3)$$

and

$$\|\bar{\mathbf{w}}^t - \mathbf{w}^* - \eta \mathbf{g}^t\|^2 = \|\bar{\mathbf{w}}^t - \mathbf{w}^*\|^2 - 2\eta \langle \bar{\mathbf{w}}^t - \mathbf{w}^*, \bar{\mathbf{g}}^t \rangle + \eta^2 \|\bar{\mathbf{g}}^t\|^2. \quad (4)$$

Let  $B_1 = -2\eta \langle \bar{\mathbf{w}}^t - \mathbf{w}^*, \bar{\mathbf{g}}^t \rangle$  and  $B_2 = \eta^2 \|\bar{\mathbf{g}}^t\|^2$ . With Assumption 2, we have

$$B_2 = \eta^2 \|\bar{\mathbf{g}}^t\|^2 \leq \eta^2 G. \quad (5)$$

We rewrite  $B_1$  by

$$\begin{aligned} B_1 &= -2\eta \langle \bar{\mathbf{w}}^t - \mathbf{w}^*, \bar{\mathbf{g}}^t \rangle \\ &= -2\eta \sum_{m=1}^M \pi_m \langle \bar{\mathbf{w}}^t - \mathbf{w}_m^t, \nabla f_m(\mathbf{w}_m^t) \rangle - 2\eta \sum_{m=1}^M \pi_m \langle \mathbf{w}_m^t - \mathbf{w}^*, \nabla f_m(\mathbf{w}_m^t) \rangle. \end{aligned}$$

By Cauchy-Schwarz inequality<sup>1</sup> and AM-GM inequality<sup>2</sup>, we have

$$-2 \langle \bar{\mathbf{w}}^t - \mathbf{w}_m^t, \nabla f_m(\mathbf{w}_m^t) \rangle \leq \frac{1}{\eta} \|\bar{\mathbf{w}}^t - \mathbf{w}_m^t\|^2 + \eta \|\nabla f_m(\mathbf{w}_m^t)\|^2. \quad (6)$$

By Assumption 1, we have  $\tau$ -weak convexity of loss function  $f(\cdot)$ :

$$-\langle \mathbf{w}_m^t - \mathbf{w}^*, \nabla f_m(\mathbf{w}_m^t) \rangle \leq -(f_m(\mathbf{w}_m^t) - f_m(\mathbf{w}^*)) - \frac{\tau}{2} \|\mathbf{w}_m^t - \mathbf{w}^*\|^2. \quad (7)$$

Applying Eq. (5)-(7) on Eq. (4), we have

$$\begin{aligned} \|\bar{\mathbf{w}}^t - \mathbf{w}^* - \eta \mathbf{g}^t\|^2 &\leq \|\bar{\mathbf{w}}^t - \mathbf{w}^*\|^2 + \eta^2 G + \\ &\quad \eta \sum_{m=1}^M \pi_m \left( \frac{1}{\eta} \|\bar{\mathbf{w}}^t - \mathbf{w}_m^t\|^2 + \eta \|\nabla f_m(\mathbf{w}_m^t)\|^2 \right) - \\ &\quad 2\eta \sum_{m=1}^M \left( f_m(\mathbf{w}_m^t) - f_m(\mathbf{w}^*) + \frac{\tau}{2} \|\mathbf{w}_m^t - \mathbf{w}^*\|^2 \right). \end{aligned}$$

The above inequality can be rewrote as:

$$\begin{aligned} \|\bar{\mathbf{w}}^t - \mathbf{w}^* - \eta \mathbf{g}^t\|^2 &\leq (1 - \tau\eta) \|\mathbf{w}_m^t - \mathbf{w}^*\|^2 + \sum_{m=1}^M \pi_m \|\bar{\mathbf{w}}^t - \mathbf{w}_m^t\|^2 + 2\eta^2 G - 2\eta \sum_{m=1}^M (f_m(\mathbf{w}_m^t) - f_m(\mathbf{w}^*)) \\ &= (1 - \tau\eta) \|\mathbf{w}_m^t - \mathbf{w}^*\|^2 + \sum_{m=1}^M \pi_m \|\bar{\mathbf{w}}^t - \mathbf{w}_m^t\|^2 + 2\eta^2 G + 2\eta \sum_{m=1}^M \pi_m (f_m(\mathbf{w}^*) - f_m(\mathbf{w}_m^t)). \end{aligned} \quad (8)$$

With Assumption 1, we have L-smooth of loss function  $f(\cdot)$ :

$$f_m(\mathbf{w}^*) - f_m(\mathbf{w}_m^t) \leq \langle \mathbf{w}^* - \mathbf{w}_m^t, \nabla f_m(\mathbf{w}_m^t) \rangle + \frac{L}{2} \|\mathbf{w}^* - \mathbf{w}_m^t\|^2. \quad (9)$$

<sup>1</sup>[https://en.wikipedia.org/wiki/Cauchy-Schwarz\\_inequality](https://en.wikipedia.org/wiki/Cauchy-Schwarz_inequality)

<sup>2</sup>[https://en.wikipedia.org/wiki/Inequality\\_of\\_arithmetic\\_and\\_geometric\\_means](https://en.wikipedia.org/wiki/Inequality_of_arithmetic_and_geometric_means)

Using Assumption 1 and Definition 1, we have:

$$f_m(\mathbf{w}^*) - f_m(\mathbf{w}_m^t) \leq \Gamma G + \frac{L}{2}\Gamma^2. \quad (10)$$

Applying Eq. (8) and Eq. (10), we can rewrite Eq. (3) as

$$\begin{aligned} \|\bar{\mathbf{v}}^{t+1} - \mathbf{w}^*\|^2 &\leq (1 - \tau\eta)\|\mathbf{w}_m^t - \mathbf{w}^*\|^2 + \sum_{m=1}^M \pi_m \|\bar{\mathbf{w}}^t - \mathbf{w}_m^t\|^2 + \\ &\quad \eta^2\|\mathbf{g}^t - \bar{\mathbf{g}}^t\|^2 + 2\eta^2G + 2\eta\Gamma G + \eta L\Gamma^2. \end{aligned}$$

With Assumption 2, we have:

$$\begin{aligned} \mathbb{E}\|\mathbf{g}^t - \bar{\mathbf{g}}^t\|^2 &= \mathbb{E}\left\|\sum_{m=1}^M \pi_m (\nabla f_m(\mathbf{w}_m^t, \mathbf{x}_m) - \nabla f_m(\mathbf{w}_m^t))\right\|^2 \\ &= \sum_{m=1}^M \pi_m^2 \|\nabla f_m(\mathbf{w}_m^t, \mathbf{x}_m) - \nabla f_m(\mathbf{w}_m^t)\|^2 \\ &\leq \sum_{m=1}^M \pi_m^2 V. \end{aligned}$$

From Lemma 3 of [1], we have:

$$\sum_{m=1}^M \pi_m \|\bar{\mathbf{w}}^t - \mathbf{w}_m^t\|^2 \leq 4\eta^2(E-1)^2G. \quad (11)$$

Let  $\Delta^t = \mathbb{E}\|\mathbf{w}_m^t - \mathbf{w}^*\|^2$ , with Assumption 1, we have

$$\mathbb{E}[f(\mathbf{w}^T)] - f(\mathbf{w}^*) \leq \langle \mathbf{w}^T - \mathbf{w}^*, \nabla f(\mathbf{w}^*) \rangle + \frac{L}{2}\|\mathbf{w}^T - \mathbf{w}^*\|^2. \quad (12)$$

For the optimal solution  $\mathbf{w}^*$ ,  $\nabla f(\mathbf{w}^*) = 0$ . So

$$\mathbb{E}[f(\mathbf{w}^T)] - f(\mathbf{w}^*) \leq \frac{L}{2}\|\mathbf{w}^T - \mathbf{w}^*\|^2 = \frac{L}{2}\Delta^t, \quad (13)$$

and

$$\Delta^{t+1} \leq (1 - \tau\eta)\Delta^t + \eta A, \quad (14)$$

where

$$A = 4\eta(E-1)^2G + \eta \sum_{m=1}^M \pi_m^2 V + 2\eta G + 2\Gamma G + L\Gamma^2. \quad (15)$$

Let  $\eta = \frac{\beta}{t+E}$  and  $v = \max\left\{\frac{\beta A}{\beta\tau-1}, (E+1)\Delta_1\right\}$ , we have

$$\begin{aligned} \Delta^{t+1} &\leq (1 - \tau\eta)\Delta^t + \eta A \\ &\leq \left(1 - \tau\frac{\beta}{t+E}\right)\frac{v}{t+E} + \frac{\beta}{t+E}A \\ &= \frac{t+E-1}{(t+E)^2}v + \left(\frac{\beta A}{(t+E)^2} - \frac{\tau\beta-1}{(t+E)^2}v\right) \\ &\leq \frac{v}{t+E+1}. \end{aligned} \quad (16)$$

Substituting Eq. (16) to Eq. (13), we get

$$\mathbb{E}[f(\mathbf{w}^T)] - f(\mathbf{w}^*) \leq \frac{L}{2} \frac{v}{E+t}. \quad (17)$$

Taking  $\beta = \frac{2}{\tau}$ , the upper bound of  $v$  can be given by

$$v \leq \frac{\beta A}{\beta\tau-1} + (E+1)\Delta_1 \leq \frac{2A}{\tau} + (E+1)\Delta_1, \quad (18)$$

where  $\Delta_1 = \|\mathbf{w}^0 - \mathbf{w}^*\|^2 \leq \Gamma^2$ .

With Eq. (17) and Eq. (18), we have

$$\mathbb{E}[f(\mathbf{w}^T)] - f(\mathbf{w}^*) \leq \frac{L}{E+t} \left( \frac{A}{\tau} + \frac{E+1}{2} \Gamma^2 \right), \quad (19)$$

where

$$A = 4\eta(E-1)^2G + \eta \sum_{m=1}^M \pi_m^2 V + 2\eta G + 2\Gamma G + L\Gamma^2. \quad (20)$$

Theorem 1 is proved.

To prove Corollary 1, we take  $\eta = \frac{2}{\tau(T+E)}$ . With Theorem 1, we have

$$\mathbb{E}[f(\mathbf{w}^T)] - f(\mathbf{w}^*) \leq \frac{L}{E+T} \left( \frac{C_1}{\tau} + \frac{C_2}{\tau^2(T+E)} + C_3 \right), \quad (21)$$

where  $C_1 = 2\Gamma G + L\Gamma^2$ ,  $C_2 = 8(E-1)^2G + 2\sum_{m=1}^M \pi_m^2 V + 4G$  and  $C_3 = \frac{E+1}{2}\Gamma^2$  are constants. So we have:

$$\mathbb{E}[f(\mathbf{w}^T)] - f(\mathbf{w}^*) \leq \mathcal{O} \left( \frac{1}{E+T} \right), \quad (22)$$

which proves Corollary 1.

## References

- [1] Xiang Li, Kaixuan Huang, Wenhao Yang, Shusen Wang, and Zhihua Zhang. On the convergence of fedavg on Non-IID data. In *ICLR*, 2020.
